# Supplementary material for: Intraindividual Variability across Neuropsychological Tests: Dispersion and Disengaged Lifestyle Increase Risk for Alzheimer’s Disease
Source: PubMed Central journal article supplement (PMC6480779; doi:10.3390/jintelligence6010012), 2018-03-01
Supplement: jintelligence-06-00012-s001.pdf [file jintelligence-06-00012-s001.pdf]

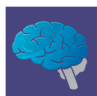

## Intraindividual Variability Across Neuropsychological Tests: Dispersion and Disengaged Lifestyle Increase Risk for Alzheimer's Disease

Drew W. R Halliday, Robert S. Stawski, Eric S. Cerino, Correne A. DeCarlo, Karl Grewal and Stuart W. S. MacDonald

Group differences on neuropsychological tests between the health control (HC), amnesic Mild Cognitive Impairment (a-MCI) and Alzheimer's Disease (AD) groups. Standard deviations are presented in parentheses. Post-hoc comparisons are based on Tukey's HSD.

|                     | HC            | a-MCI          | AD               |
|---------------------|---------------|----------------|------------------|
| MAT 1               | 48.39 (7.92)  | 49.24 (10.71)  | 59.29 (11.38) *+ |
| MAT 2               | 50.06 (9.70)  | 49.05 (10.70)  | 54.81 (7.23)     |
| MAT 3               | 52.60 (8.82)  | 49.78 (9.58)   | 39.56 (9.62) *+  |
| Digit Span Foreword | 52.74 (10.51) | 49.40 (8.62)   | 40.24 (3.31) *   |
| Digit Span Backward | 51.86 (9.45)  | 50.87 (9.27)   | 39.16 (7.94) *+  |
| 3MS                 | 55.21 (3.61)  | 49.72 (5.45) * | 28.59 (11.16) *+ |
| NAART               | 54.17 (8.13)  | 47.84 (7.97) * | 39.51 (13.16) *  |
| Trail Making Test A | 46.90 (4.03)  | 49.98 (4.32)   | 63.36 (23.74) *+ |
| Trail Making Test B | 45.41 (3.47)  | 48.99 (5.30) * | 73.00 (8.90) *+  |
| RAVLT Total         | 57.02 (6.58)  | 46.00 (4.52) * | 33.06 (6.31) *+  |
| RAVLT A6            | 57.54 (6.65)  | 44.09 (5.96) * | 37.11 (3.23) *+  |
| RAVLT A7            | 57.47 (6.53)  | 43.76 (6.89) * | 38.51 (2.15) *   |
| Benton VRT          | 54.96 (3.12)  | 48.73 (7.44) * | 32.91 (15.70) *  |
| Digit Symbol        | 54.96 (8.26)  | 47.95 (7.23) * | 35.47 (7.73) *+  |
| Block Design        | 50.85 (8.77)  | 51.68 (9.54) * | 40.84 (12.20) *  |
| Similarities        | 53.57 (5.76)  | 51.93 (4.17)   | 42.22 (15.56)    |
| Word Fluency        | 54.11 (7.12)  | 48.11 (10.69)  | 39.77 (8.49) *   |
| Animal Fluency      | 54.50 (8.67)  | 48.56 (7.34) * | 35.44 (7.02) *   |
| ALQ Total           | 53.94 (7.57)  | 48.08 (8.97)   | 40.01 (14.08) *  |

Note: \*  $p < 0.05$  for HC contrast; +  $p < 0.05$  for a-MCI contrast.
